# Supplementary material
Source: PubMed Central journal article supplement (PMC8271637)
Supplement: pnas.2026152118.sapp.pdf [file pnas.2026152118.sapp.pdf]

1  
2  
3  
4  
5  
6  
7  
8  
9  
10  
11  
12  
13  
14  
15  
16  
17  
18  
19  
20  
21  
22  
23  
24  
25  
26  
27  
28  
29

**Supplementary Information for**

Loss of function of a DMR6 ortholog in tomato confers broad-spectrum disease resistance

Daniela Paula de Toledo Thomazella, Kyungyong Seong, Rebecca Mackelprang, Douglas Dahlbeck, Yu Geng, Upinder S. Gill, Tiancong Qi, Julie Pham, Priscila Giuseppe, Clara Youngna Lee, Arturo Ortega<sup>1,4</sup>, Myeong-Je Cho, Samuel F. Hutton and Brian Staskawicz\*

\* To whom correspondence should be addressed.  
**Email:** stask@berkeley.edu

**This PDF file includes:**

- Supplementary text
- Figures S1 to S13
- Table S1 and S2
- Captions for databases S1 to S5
- References for SI reference citations

**Other supplementary materials for this manuscript include the following:**  
Datasets S1 to S5

## 30 **Supplementary Information Text**

31

## 32 **Materials and Methods**

33

### 34 **Phylogenetic analysis and data mining**

35 To reconstruct the phylogenetic tree for the 2-oxoglutarate Fe(II) dependent oxygenase  
36 superfamily, we collected the sequences of functionally characterized proteins, namely AtDMR6,  
37 AtDLO1, AtDLO2, AtFLS, AtFH3, AtANS, AtACC and PcFNS. We searched with BLASTP their  
38 homologous sequences from angiosperm species with well-annotated genomes. They included the  
39 monocots corn (*Zea mays*), rice (*Oryza sativa*) and sorghum (*Sorghum bicolor*) and the dicots  
40 *Arabidopsis thaliana*, cacao (*Theobroma cacao*), cassava (*Manihot esculenta*), bean (*Phaseolus*  
41 *vulgaris*), lettuce (*Lactuca sativa*), papaya (*Carica papaya*), and some species from the Solanaceae  
42 family, including eggplant (*Solanum melongena*), pepper (*Capsicum annuum*), potato (*Solanum*  
43 *tuberosum*) and tomato (*Solanum lycopersicum*) (1). The matches that showed e-value of 1E-4 and  
44 70% bi-directional coverages with the queries were retained. All the remaining sequences, together  
45 with the outgroup S7S0B0, were aligned with MAFFT v7.313 (--maxiterate 1000 --globalpair) (2).  
46 Columns with 80% or more gaps were removed. The resulting multiple sequence alignment was  
47 used to infer a maximum-likelihood tree using RAxML v8.2.12 (-p 12345 -# 100 -m  
48 PROTGAMMAWAGF) with 500 rapid bootstrap replications (3). Homologs that clustered with  
49 AtDMR6 were defined as DMR6 clade. We selected two tomato homologs SIDMR6-1 and SIDMR6-  
50 2 in the DMR6 clade for the study. Publicly available transcriptome data (4–6) were inspected for  
51 *SIDMR6-1* and *SIDMR6-2* expression in response to different pathogens, such as *Pseudomonas*  
52 *syringae* (bacteria), *Phytophthora capsici* (oomycete) and *Moniliophthora perniciosa* (fungus). In  
53 addition, we selected the cacao and cassava (Thecc1EG015521t1 and Manes.01G043500.1)  
54 *DMR6* orthologs, which were named *TcDMR6* and *MeDMR6*, respectively, and analyzed their  
55 expression in public transcriptomic data (7–9).

56

### 57 **Promoter analysis**

58 We collected 1-kb promoter regions of *SIDMR6-1* and *SIDMR6-2* from *Solanum*  
59 *lycopersicum*, *Solanum pennellii*, *Capsicum annuum*, *Capsicum baccatum*, *Petunia axillaris* and  
60 *Petunia inflata* from Sol Genomics (<https://solgenomics.net>). For each orthologous group, we  
61 performed conserved motif search with Multiple Expression motifs for Motif Elicitation (MEME)  
62 v5.0.5 (10). The UTRs of *SIDMR6-1* and *SIDMR6-2* were obtained from their cDNAs. We selected  
63 motifs predicted outside the UTRs and conserved in all six species. We ran TOMTOM to compare  
64 the predicted motifs to transcription binding sites available in JASPAR (11).

65

### 66 **Biological material and growth conditions**

67 For all experiments, we used the wild type plant Fla. 8000, which is susceptible to  
68 *Xanthomonas* (12). Wild type and mutant (*Sldmr6-1* and *Sldmr6-2*) plants were grown on soil  
69 (Miracle-Gro Supersoil Potting Soil) in a growth chamber at 25°C under a 16-h light/8-h dark  
70 photoperiod and 50% relative humidity. Experiments were performed with six-week-old plants.  
71 Experiments in which the mutant allele was not specified were performed with the mutants *Sldmr6-*  
72 *1.2* and *Sldmr6-2.2* as representatives of the genotypes *Sldmr6-1* and *Sldmr6-2*, respectively.

73 *Pseudomonas syringae* pv. *tomato* DC3000 (*Pst* DC3000), *Xanthomonas gardneri* 153  
74 (Xg153), *X. perforans* 4B (Xp4B) were used for plant inoculation. *Agrobacterium tumefaciens*  
75 strains C58C1 and GV3101 were used for transient expression and tomato transformation,  
76 respectively. For pathogen assays, bacterial cultures were grown in NYG (peptone 5 g/l, yeast  
77 extract 3 g/l, glycerol 20 ml/l) for 18 h at 28°C on a shaker at 150 rpm. *Phytophthora capsici* (LT1534  
78 isolate) was maintained at 25°C on either Rye A Agar in the dark for mycelial growth or 10%  
79 Unclarified V8 Agar in the light for sporangium formation. Spores of *Pseudoidium neolycopersici*  
80 (MF-1 isolate) were maintained and propagated on tomato Moneymaker plants in an isolated  
81 growth room at 25°C with a 12-h photoperiod.

82

### 83 **Cas9-mediated inactivation of *SIDMR6-1* and *SIDMR6-2* genes**

84 Two guide RNAs (gRNAs) were used for each of the target genes: *SIDMR6-1*  
85 (Solyc03g080190) and *SIDMR6-2* (Solyc06g073080). Each guide was independently cloned into a  
86 pENTR/D-TOPO-based entry plasmid containing the *Arabidopsis* U6-26 promoter to drive gRNA  
87 expression and a double 35S promoter driving Cas9 expression (13, 14). A gateway LR reaction  
88 (Thermo Fisher Scientific) was used to move the gRNA and Cas9 cassette into a pPZP200-based  
89 binary vector (15). Before proceeding to tomato transformation, gRNA activity was evaluated by  
90 *Agrobacterium*-mediated transient expression of the binary plasmid into *N. benthamiana* leaves as  
91 described before (13). Using the *Agrobacterium tumefaciens* co-cultivation method, the binary  
92 construct was used for transformation into the Fla. 8000 variety at the University of Nebraska Plant  
93 Transformation Core Research Facility (<https://biotech.unl.edu/plant-transformation>). Kanamycin-  
94 resistant plants were genotyped, and the selected mutants were selfed for the use in subsequent  
95 experiments. All primers are listed in Table S1.

96

### 97 **RNA extraction and qRT-PCR (Quantitative Real-Time Polymerase Chain Reaction)**

98 Leaf samples were collected 6 hours after syringe infiltration with *X. gardneri*. Total RNA  
99 was extracted using the Spectrum Plant Total RNA kit (Sigma, STRN250). Reverse transcription  
100 was performed with 1 µg total RNA, using the SuperScript III First-Strand Synthesis SuperMix for  
101 qRT-PCR (Invitrogen, 11752-250). Gene expression was quantified with the IQ SYBR Green

102 Supermix (BIO-RAD Cat. 1708882) on a BioRad CFX96 qPCR System. *S/Act* (Solyc03g078400)  
103 gene was used as internal control. Three biological replicates were used for each experimental  
104 condition. Primer sequences are listed in Table S1.

105

## 106 **Pathogen assays**

107 Bacteria were grown in NYG (0.5% peptone, 0.3% yeast extract, 2% glycerol) with 100  
108 µg/ml rifampicin on a shaker at 200 rpm, at 28°C overnight. After centrifugation at 4,000 ×g for 15  
109 min, cells were washed once with 10 mM MgCl<sub>2</sub>, and diluted to OD<sub>600nm</sub>=0.1 for infection assays.  
110 Plants were infected by dip inoculating three leaflets into the bacterial suspension amended with  
111 0.02% Silwet L-77. Infected plants were grown on a 12-h photoperiod at 25°C until symptoms  
112 develop. Leaf punches were collected, homogenized and then serially diluted. For quantification of  
113 bacterial populations, serial dilutions of leaf homogenates were plated onto NYGA (0.5% peptone,  
114 0.3% yeast extract, 2% glycerol, 1.5% agar) with 100 µg/ml rifampicin and 50 µg/ml cycloheximide.  
115 After incubation at 28°C for 4 to 5 days, typical colonies of *Xanthomonas* spp./*P. syringae* were  
116 counted, and the bacterial population on each genotype was estimated.

117 For *P. capsici* pathogen assay, isolate LT1534 was grown on V8 agar 10% at 25°C for  
118 three days in the dark and for additional two days under fluorescent light. For inoculation, a plate  
119 covered with mycelium was flooded with cold water and the zoospore suspension was obtained  
120 after 30 minutes at room temperature. Leaves were spot inoculated by pipetting 10 µl droplets of  
121 the spore suspension (10<sup>5</sup> spores/ml) on the adaxial side of each tomato leaflet.

122 *P. neolycopersici* assay was performed by evenly spraying fungal spores from infected  
123 branches on the aerial parts of the plants. Fungal growth was evaluated at 5 and 7 days after  
124 inoculation (dai). The terminal leaflet of the fifth true leaf was sampled, and its fresh weight was  
125 determined. Leaflets were individually placed in 50 ml falcon tubes with 20 ml H<sub>2</sub>O, vortexed for 60  
126 sec and filtered with Miracloth. The liquid was centrifuged at 3100 xg for 30 mins and the pellet was  
127 resuspended in 500 µl 50% glycerol. An aliquot (50 µl) was then used for counting the spores on  
128 an epifluorescence microscope.

129

## 130 **Measurement of tomato growth**

131 To evaluate the effect of *SIDMR6-1* and *SIDMR6-2* mutations on plant growth, the height of  
132 *Sldmr6-1*, *Sldmr6-2* and wild type plants (18 individuals from each genotype) was recorded using  
133 a tape measure (Stanley FatMax 25'). For this, seeds were sowed in supersoil potting soil (Miracle-  
134 Gro) and maintained in a growth chamber at 25°C, 16-h light/8-h dark photoperiod and 50% relative  
135 humidity. Shoot length was determined 30 days after seedling emergence by measuring the  
136 distance between the base of the cotyledon leaves and the apical meristem. Statistical significance

137 was assessed using a one-way ANOVA and post hoc Tukey's honestly significant difference (HSD)  
138 test ( $p \leq 0.05$ ).

139

#### 140 **Promoter GUS transgenic lines and histochemical GUS staining**

141 A 2.5-kb fragment including the putative *SIDMR6-1* promoter was amplified with specific  
142 primers (Table S1) and cloned via LR reaction into the gateway binary vector pGWB3 (16) to  
143 generate the *proSIDMR6-1:GUS* binary vector. The histochemical GUS assay was performed using  
144 a previously described method (17). Leaves from wild type and *proSIDMR6-1:GUS* lines were  
145 syringe infiltrated with staining buffer (0.5 mg/ml 5-bromo-4-chloro-3-indolyl glucuronide in 0.1 M  
146  $\text{Na}_2\text{HPO}_4$ , pH 7 and 10 mM  $\text{Na}_2\text{EDTA}$ ) and maintained at 37°C, overnight. After the staining buffer  
147 was removed, samples were cleared with 70% ethanol. Leaves were imaged with a handheld digital  
148 camera.

149

#### 150 **Salicylic acid (SA) analysis using liquid chromatography (LC)-MS/MS**

151 Leaf samples of plants growing under laboratory conditions were collected 6 hours after  
152 syringe infiltration with *X. gardneri* suspension ( $\text{OD}_{600} = 0.25$ ). Total SA (the sum of free SA and SA  
153 glucosides) was extracted from 100 mg of frozen leaf tissues, after the addition of appropriate  
154 internal standards as described previously (18). Three biological replicates of each leaf sample  
155 were used. Following extraction from plant tissues, 10  $\mu\text{l}$  of the extracts were injected for analysis  
156 with an LC-MS/MS (18). LC-MS/MS analysis were achieved using a PE Sciex 3000 triple quad  
157 mass spectrometer equipped with a CTC autosampler and Shimadzu LC-MS system. These  
158 analyses were performed at the UNC (University of North Carolina) Department of Chemistry Mass  
159 Spectrometry Core Laboratory (<https://chem.unc.edu/critcl-main/critcl-mass-main/>).

160

#### 161 **RNA-seq analysis**

162 Four individual plants of each genotype (wild type, *Sldmr6-1.1* and *Sldmr6-1.2* mutants)  
163 were used for RNA sequencing. Two leaves from each plant were infiltrated with mock solution (10  
164 mM  $\text{MgCl}_2$ ) or *X. gardneri* suspension ( $\text{OD}_{600} = 0.25$ ). Six hours after syringe infiltration, leaf  
165 samples were collected, and total RNA was extracted using the Spectrum Plant Total RNA kit  
166 (Sigma, STRN250). A total of 24 RNA sequencing libraries were prepared using the illumina  
167 TruSeq Stranded mRNA Library Prep (illumina 20020594). All libraries were sequenced as 50bp  
168 single-end reads on a HiSeq 4000 sequencing platform. Illumina adapters and low-quality reads  
169 were removed from the sequenced libraries using Trim Galore v0.6.4 (--illumina -q 20)

170 (bioinformatics.babraham.ac.uk). The filtered reads were aligned to the reference genome (SL 4.0)  
171 using STAR v2.6.1c (19). We used primary alignments for gene counting using FeatureCounts  
172 v1.6.3 (20), and edgeR to analyze differentially expressed genes (DEGs) (21). For two compared  
173 conditions, DEGs were defined to have  $|\log_2 \text{Fold Change}| \geq 1$  and false discovery rate (FDR) <  
174 0.05. We employed eggNog-mapper (22) to obtain functional annotations for ITAG 4.0, and  
175 clusterProfiler (23) to perform gene ontology enrichment tests using the functional annotations of  
176 the DEGs.

177

### 178 **Reverse transcription-polymerase chain reaction (RT-PCR)**

179 Expression of *SIDMR6-2* gene was evaluated by semiquantitative RT-PCR in leaves and  
180 flowers of wild type plants. The Spectrum Plant Total RNA kit (Sigma, STRN250) (with on-column  
181 DNaseI treatment) and the SuperScript III First-Strand Synthesis System (Invitrogen) were used to  
182 make cDNA from 1  $\mu\text{g}$  of RNA. One microliter of cDNA was used for 24 cycles of amplification  
183 using Phusion HF polymerase (New England Biolabs). *S/Act* (Solyc03g078400) gene was used as  
184 internal control. Three biological replicates were used for each condition. The primer sequences  
185 are listed in Table S1.

186

### 187 **Recombinant protein expression and purification**

188 The coding sequences of *SIDMR6-1*, *SIDMR6-2*, *SIDMR6-1\_H212Q*, *SIDMR6-2\_H215Q*,  
189 *AtDMR6* and *AtDLO1* were PCR-amplified with specific primers (Table S1) and cloned into pGEM-  
190 T easy vector (Promega). These inserts were digested and subcloned into pET28a vector  
191 (Novagen) for protein expression in *E. coli*. All constructs were verified by DNA sequencing.

192 All six constructs were individually introduced into rosetta 2(DE3)pLysS cells, which were  
193 grown at 37°C in 2YT medium (Sigma) with appropriate antibiotics. Recombinant protein  
194 expression was induced with 0.5 mM isopropyl- $\beta$ -D-thiogalactoside (IPTG), and cultures were  
195 grown overnight at 16°C. For protein purification, cells were disrupted by sonication on ice and  
196 proteins were bound to a Nickel-affinity column (HisTrap Crude FF, GE Life Sciences). Elution was  
197 carried out by sequential additions of elution buffer containing imidazole. Recombinant proteins  
198 were desalted into IEX Buffer A (20 mM Tris-HCl pH 8.0, 50 mM NaCl) using HiPrep 26/10 desalting  
199 column according to manufacturer's instructions (GE Life Sciences). Desalted proteins were loaded  
200 onto a 5 ml Q HP column and eluted with 50-1000 mM NaCl over 15 CV. Fractions containing  
201 monomeric proteins were pooled and concentrated. Protein concentrations were determined by  
202 Coomassie-based assay. Samples were sterile-filtered, flash-frozen in liquid nitrogen, and stored  
203 at -80°C.

204

### 205 ***In vitro* activity assays**

206 The enzyme assay was performed according to a previously described method with some  
207 modifications (24). The reaction mixture included 50 mM MES, pH 6.5, 0.4 mM FeSO<sub>4</sub>, 10 mM  
208 ascorbic acid, 1 mM 2-oxoglutarate, 10 μM salicylic acid, and 12 μg of recombinant purified protein,  
209 in a final volume of 100 μl. The ferrous sulfate (FeSO<sub>4</sub>) solution was prepared in 100 mM sodium  
210 acetate, pH 5.5 and 10mM ascorbic acid. Activity assays were performed at 40°C for 60 min in  
211 open tubes with shaking (225 rpm). Reactions were initiated by addition of the enzyme and  
212 terminated by filtration through a 0.22 μm syringe filter (Millipore). Samples were then analyzed by  
213 HPLC.

214

### 215 **HPLC quantification**

216 HPLC separation was performed on a Shimadzu SCL-10A system with a Shimadzu RF-  
217 10A scanning fluorescence detector and a Shimadzu SPD-M10A photodiode array detector.  
218 Samples were separated on a 5-μm, 15 cm x 4.6-mm i.d. Supelcosil LC-ABZ Plus column (Supelco)  
219 preceded by a LC-ABZ Plus guard column. Prior to loading the 50-μl sample, the column was  
220 equilibrated with 15% acetonitrile in 25 mM KH<sub>2</sub>PO<sub>4</sub>, pH 2.5, at a flow rate of 1.0 ml/min. The  
221 concentration of acetonitrile was increased linearly to 20% over 10 minutes, followed by an increase  
222 to 43% linearly over the next 12 minutes, followed by an increase to 66% over the next 2 minutes.  
223 This was followed by isocratic flow at 66% for 5 minutes, followed by a decrease to 15% acetonitrile  
224 linearly over the next 5 minutes and isocratic flow at 15% for 3 min. 2,5-DHBA and SA were  
225 quantified using a fluorescence detector set at 320-nm excitation/449-nm emission for 2,5-DHBA  
226 and 305/407 for SA. Under these conditions, 2,5-DHBA eluted at approximately 9 minutes and SA  
227 eluted at approximately 20 minutes. HPLC-grade solvents were employed for all HPLC buffers and  
228 solutions.

229

### 230 **Homology modeling and *in silico* ligand docking**

231 Homology models for SIDMR6-1 (NP\_001233840.2) and SIDMR6-2 (XP\_004241427.1)  
232 were built using the HHpred server and the MODELLER software (25), which are available at the  
233 MPI Bioinformatics Toolkit (<https://toolkit.tuebingen.mpg.de/#/>). The structure of Anthocyanidin  
234 synthase (ANS) from *Arabidopsis thaliana* (26) was the selected template (PDB ID 1GP6, 35-30%  
235 sequence identity with target proteins), because it was determined in complex with the cofactor  
236 Fe(II), succinic acid and its substrate, thus representing a desirable conformational state for the  
237 ligand docking procedure. The quality of built models was evaluated using the z-DOPE score  
238 calculated by the SaliLab Model Evaluation Server (<http://modbase.compbio.ucsf.edu/evaluation/>),

239 which is lower than -1.0 for good models and between 0 and -1 for reasonable models. The models  
240 were also validated using the SAVES v5.0 service (<http://servicesn.mbi.ucla.edu/SAVES/>) (27).

241 For the *in silico* ligand docking, we used the AutoDockTools v1.5.6 (28) to add non-polar  
242 hydrogens to the ligands (naringenin or salicylic acid) and enzymes (SIDMR6-1 or SIDMR6-2), to  
243 prepare the PDBQT files, and to define the grid center and the grid box size. The stochastic search  
244 algorithm of AutoDock Vina (29) was used to dock the ligands to the substrate binding site of  
245 SIDMR6-1 or SIDMR6-2. The results that best agree with our functional data as well as with the  
246 expected positioning of the reactive atom of the ligand compared to the crystallographic structure  
247 of naringenin (26) bound at AtANS were analyzed and discussed here.

248

### 249 **Field trial assays**

250 Seeds were sown on February 26, 2019 and single row plots of 10 plants were established  
251 in the field on March 12, 2019 at the Gulf Coast Research and Education Center (GCREC) in Balm,  
252 FL. Experimental plots were arranged in a randomized complete block design with four replications.  
253 Tomato seedlings were transplanted into raised beds covered with reflective polyethylene mulch.  
254 Pic-Clor 60 fumigant was applied at a rate of 336,25 kg/ha. Between-bed spacing was five feet,  
255 and plants were spaced 18 inches in the row. Plants were staked and tied, and irrigation was  
256 applied through drip tape beneath the plastic mulch. A recommended fertilizer and pesticide  
257 program was followed throughout the growing season, excluding the use of SAR inducers, copper,  
258 and other bactericides. Plants were inoculated on April 19, 2019 with a four-isolate cocktail of *X.*  
259 *perforans* race T4 ( $10^6$  CFU per ml of each of strains GEV904, GEV917, GEV1001, GEV1063).  
260 Individual plants were evaluated for bacterial spot disease severity on May 22, 2019 using the  
261 Horsfall-Barratt rating scale (30). Vine-ripened (breaker stage through red) fruits were harvested  
262 two times from eight plants of each plot on May 28, 2019 and June 6, 2019. Fruits were weighed  
263 and graded according to USDA standards (51.1859 of the US Standards for Grades of Fresh  
264 Tomatoes) (31). Note that small fruits are 7x7 (unmarketable), and medium, large and extra-large  
265 fruits are 6x7, 6x6 and 5x6, respectively, according to the USDA specifications (31). To calculate  
266 total marketable yield, only the medium, large and extra-large fruit categories were considered.  
267 Small fruits are unmarketable and, therefore, are not used to determine total marketable yield.

268

269



A.

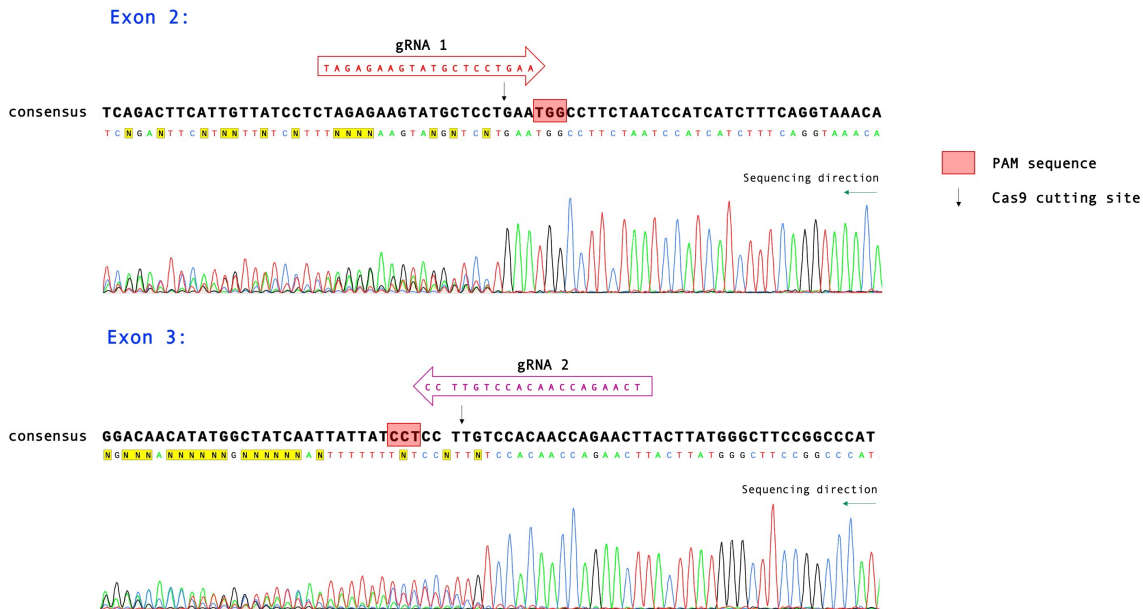

B.

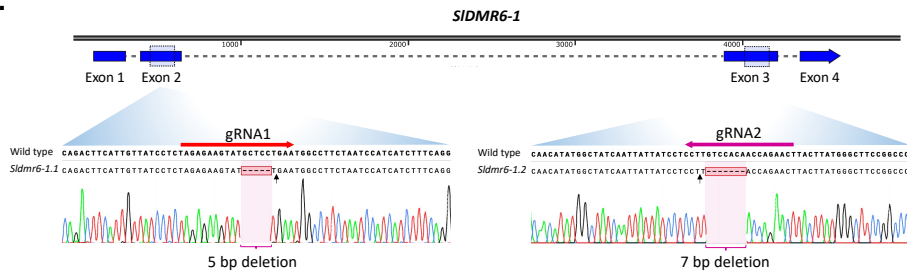

271  
272  
273  
274  
275  
276  
277  
278  
279  
280  
281  
282

**Fig. S1.** Schematic representation of *SIDMR6-1* guide RNAs (gRNAs) and mutant alleles. (A) Two gRNAs were designed to independently target the second exon (gRNA 1) and the third exon (gRNA 2) of the *SIDMR6-1* gene. To evaluate gRNA activity, we used *Agrobacterium*-based transient expression assays in *Nicotiana benthamiana*. The target regions were sequenced, and the overlapping peaks on the chromatogram indicate that both gRNAs are active *in planta* (B) Two independent constructs containing gRNA 1 or gRNA 2 were used to produce stable tomato transformants. Two homozygous lines with frameshift deletion alleles, named *Sldmr6-1.1* and *Sldmr6-1.2*, were generated. The predicted cut sites of each gRNA are indicated with an arrow, and the black dashes highlighted in red correspond to the missing DNA bases that cause a frameshift in the protein sequence.

A.

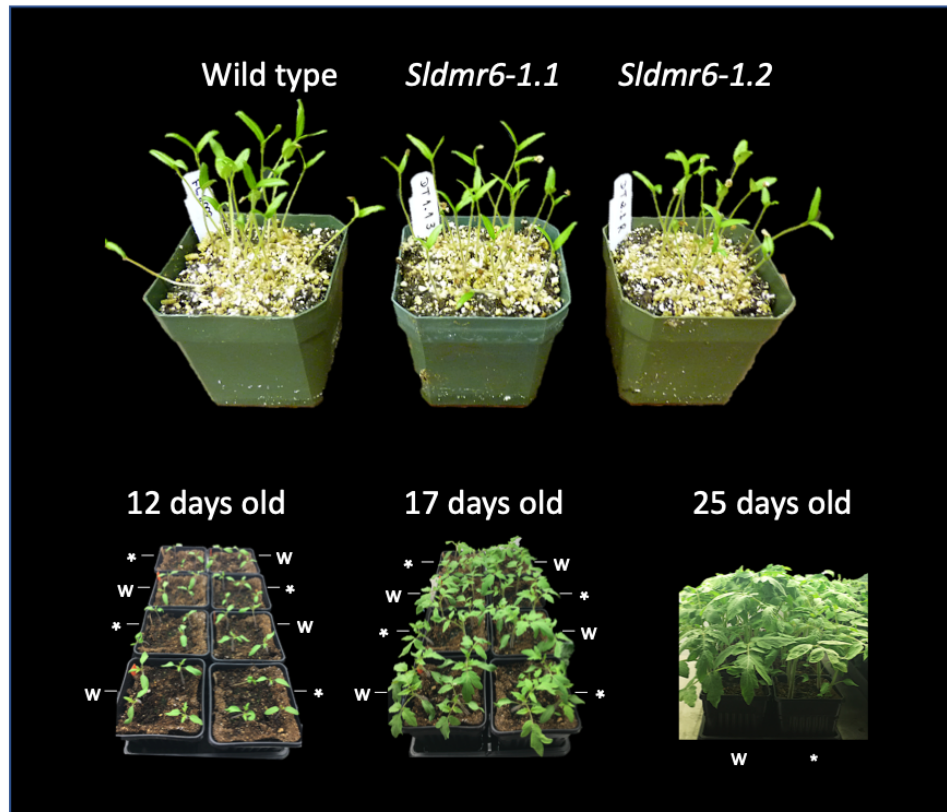

B.

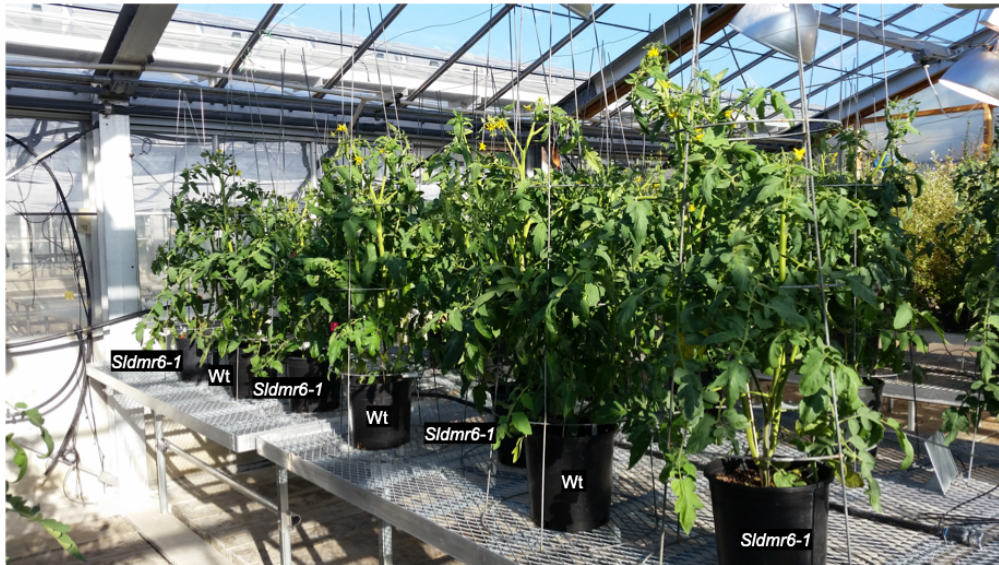

283  
284  
285  
286  
287  
288  
289

**Fig. S2.** *SIDMR6-1* impairment does not have a clear effect on plant growth under laboratory conditions. (A) Growth phenotype of wild type and *Sldmr6-1* mutants grown in a growth chamber at 24°C under a 16-h light/8-h dark photoperiod and 50% relative humidity. Asterisks and letter “w” indicate *Sldmr6-1.2* mutants and wild type lines, respectively. (B) Growth phenotype of wild type (Wt) and *Sldmr6-1* lines (*Sldmr6-1.2*) grown in the greenhouse at 25°C under a 16-h light/8-h dark photoperiod. *Sldmr6-1* mutants are intercalated with wild type plants.

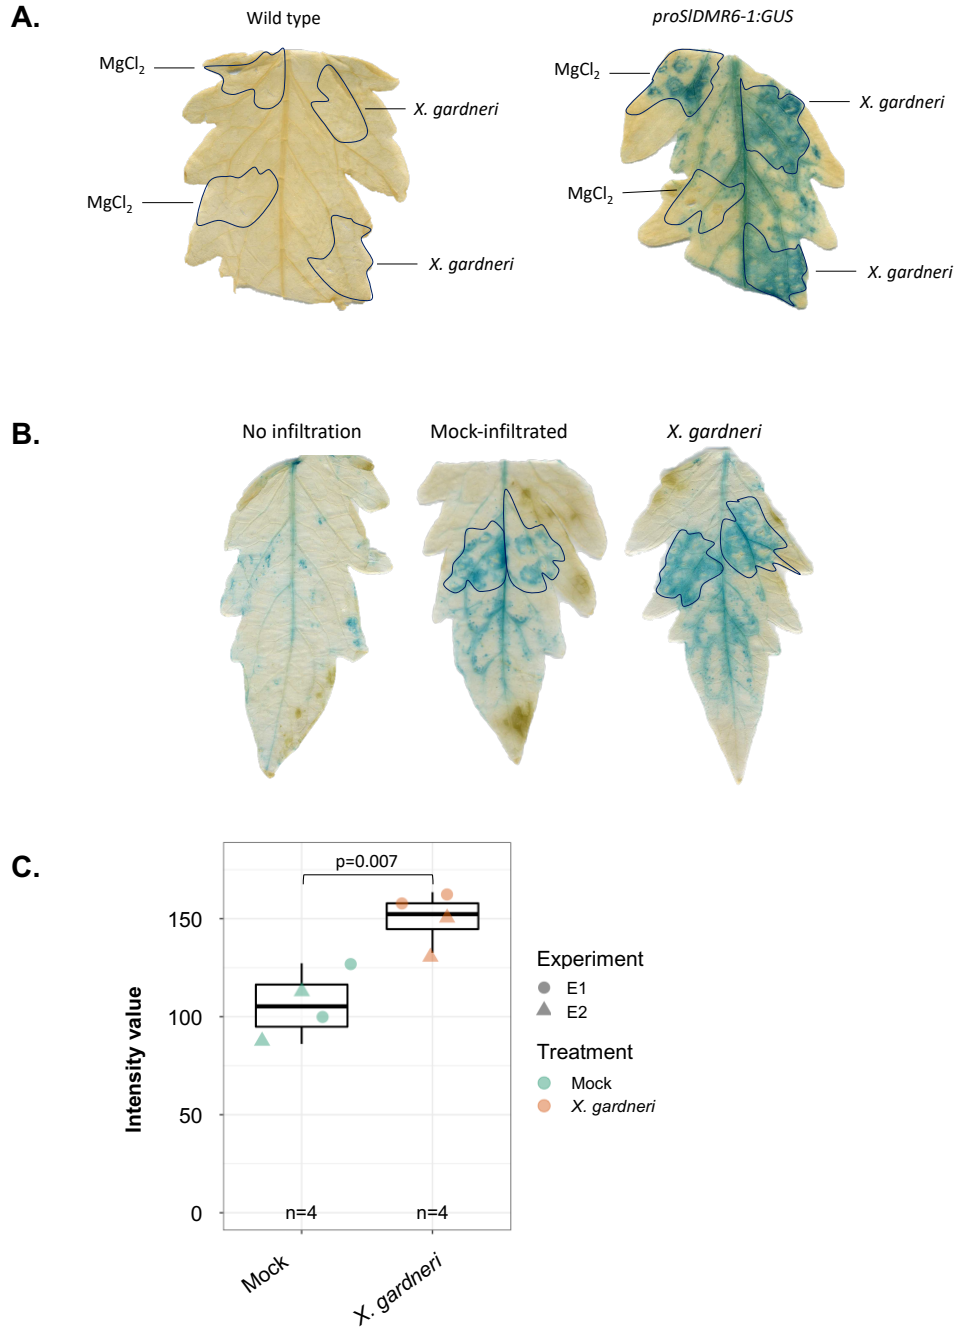

290  
291  
292  
293  
294  
295  
296  
297  
298  
299  
300  
301  
302

**Fig. S3.** Histochemical GUS assay of wild type and *proSIDMR6-1:GUS* tomato leaves in response to *Xanthomonas gardneri* 153 (*Xg*) infection. (A) A single leaf of the wild type or *proSIDMR6-1:GUS* line was infiltrated with mock solution on the left side and *Xg* suspension cells on the right side. (B) In another experimental design, leaves from the *proSIDMR6-1:GUS* line were individually submitted to three different conditions: (i) no infiltration, (ii) infiltration with mock solution (iii) infiltration with *Xg* suspension cells. GUS activity in wild type and *proSIDMR6-1:GUS* lines was visualized using X-gluc as a substrate. Based on the intensity of the GUS coloration in (A) and (B), we observed a significant infiltration effect on the *proSIDMR6-1:GUS* expression. Despite this, GUS staining was slightly higher in the *Xg*-infiltrated sites, confirming the up-regulation of *SIDMR6-1* by pathogen infection. Images were taken eight hours after mock or *Xg* infiltration. (C) Graph showing the mean GUS intensity measured within the inoculation site using the ImageJ software (32). E1 and E2 correspond to the experiments that are shown in (A) and (B), respectively.

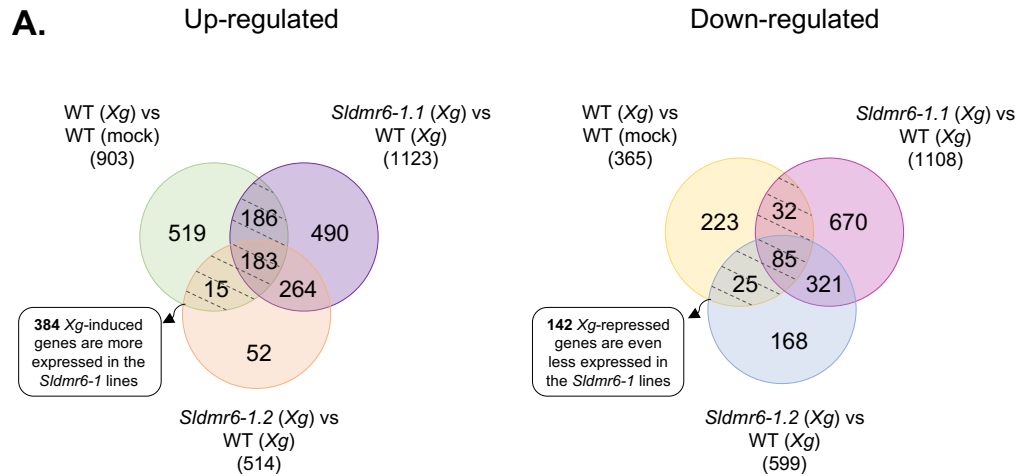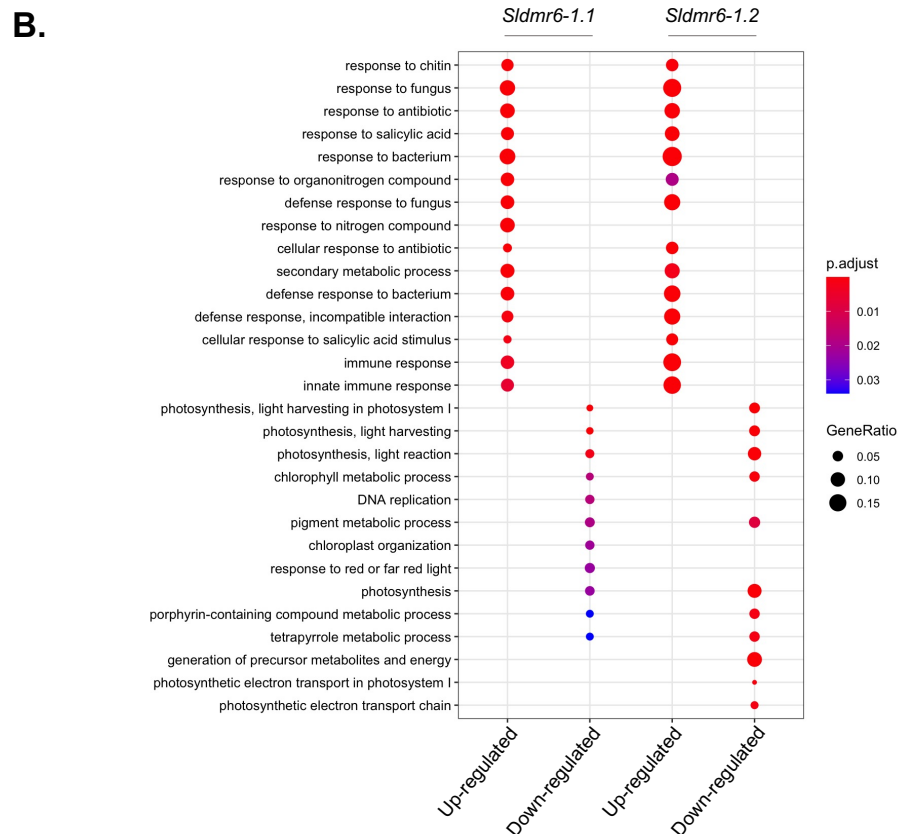

303  
 304 **Fig. S4.** Transcriptional response to *Xanthomonas gardneri* (Xg) infection in the wild type and  
 305 *Sldmr6-1* lines (*Sldmr6-1.1* and *Sldmr6-1.2*). (A) Venn diagram showing Xg-responsive genes (Wt-  
 306 Xg vs Wt-mock) that are up-regulated in the *Sldmr6-1* lines in comparison to wild type plants (left panel) and Xg-responsive genes (Wt-Xg vs Wt-mock) that are down-regulated in the *Sldmr6-1* lines  
 307 in comparison to wild type plants (right panel). Notably, the expression of many Xg-induced genes  
 308 (left panel) is higher in the *Sldmr6-1* lines than in wild type plants, whereas the expression of several  
 309 Xg-repressed genes (right panel) is even lower in the mutants. (B) Gene Ontology (GO) analyses  
 310 showed that the up-regulated genes of the infected *Sldmr6-1* mutants are enriched in GO terms  
 311 associated with plant immunity, while down-regulated genes of the infected *Sldmr6-1* mutants are  
 312 enriched in GO terms related to photosynthetic processes.  
 313

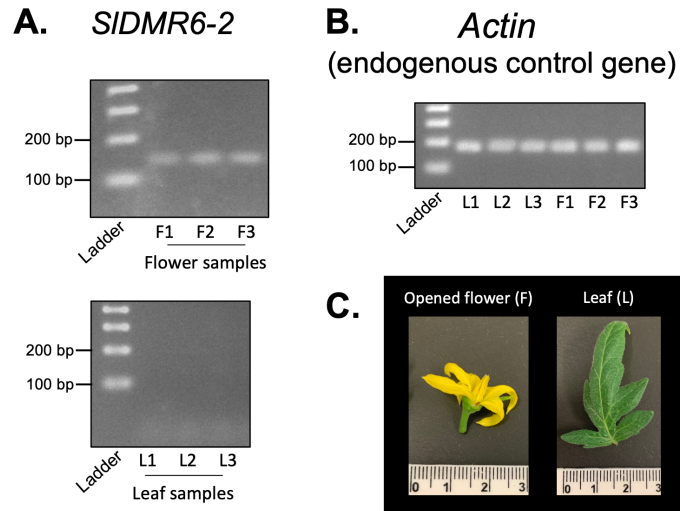

314  
315  
316  
317  
318  
319  
320  
321

**Fig. S5.** Expression of the *SIDMR6-2* gene is detected in flowers (F) but not in leaf tissues (L) of wild type tomato plants. (A) *SIDMR6-2* expression was evaluated by RT-PCR in flowers and leaves of tomato. In agreement with our analysis of public transcriptome data, *SIDMR6-2* expression is detected in flowers but not in leaf tissues. (B) *SIAct* (Solyc03g078400) was used as internal control since it shows very similar expression levels in both tomato tissues. (C) Representative image of the tissues collected for RT-PCR analysis, opened flowers (F) and leaves (L).

Soly03g080190.3.1 (DMR6-1)

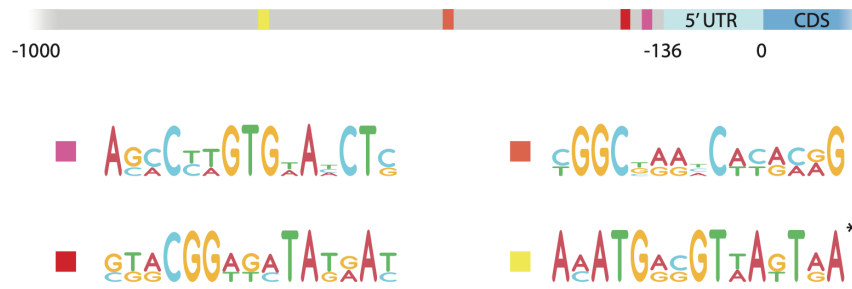

\* Detectable similarity to the binding sites of bZIP14/50/60/910 and TGA1A/2/3/5/6/9

Soly06g073080.3.1 (DMR6-2)

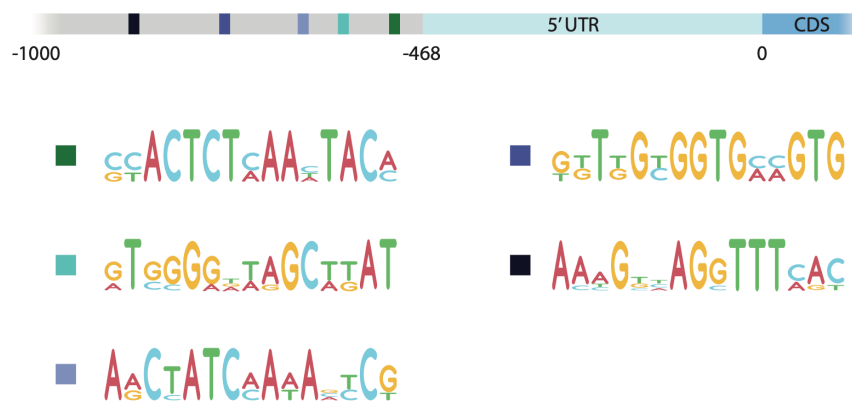

322  
323  
324  
325  
326  
327  
328  
329  
330  
331

**Fig. S6.** Comparison of the *SIDMR6-1* and *SIDMR6-2* promoter regions. The 1-kb upstream regions of *SIDMR6-1*, *SIDMR6-2* and their respective orthologs were collected from tomato (*Solanum lycopersicum*), *Solanum pennellii*, pepper (*Capsicum annuum*), *Capsicum baccatum*, *Petunia axillaris* and *Petunia inflata*. Conserved DNA motifs located outside the UTR inferred from the cDNA data were selected and annotated. Comparison of the similarity of the chosen motifs with known transcription binding sites revealed that the *SIDMR6-1* promoter has a motif with similarity to the binding sites of several basic leucine zipper (bZIP) TGA transcription factors (p-value < 0.001).

A.

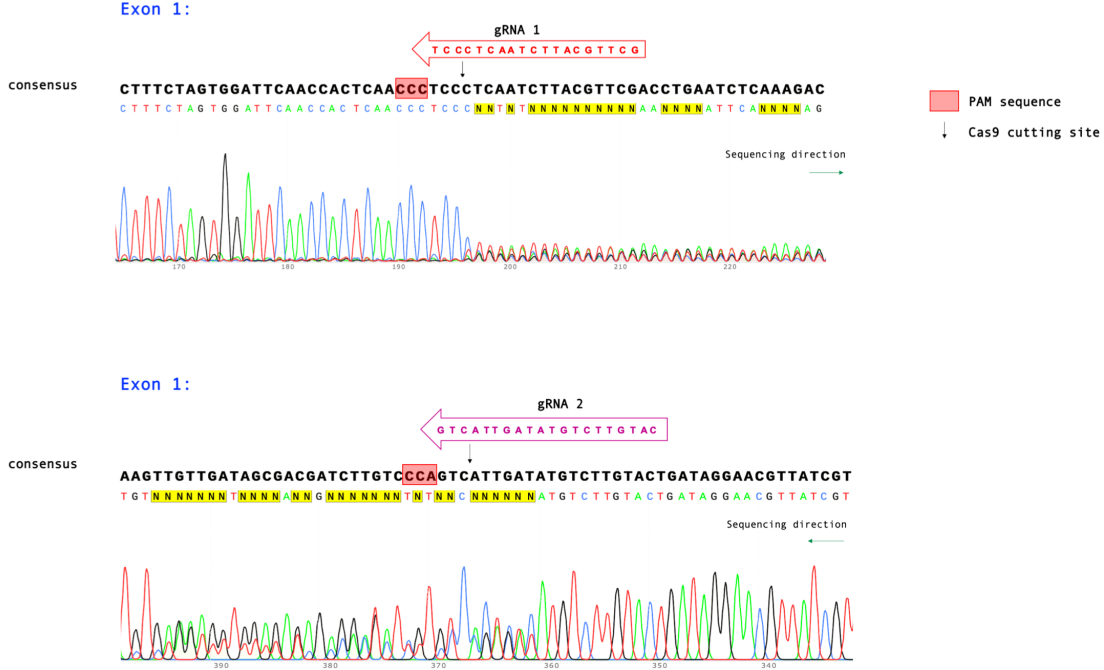

B.

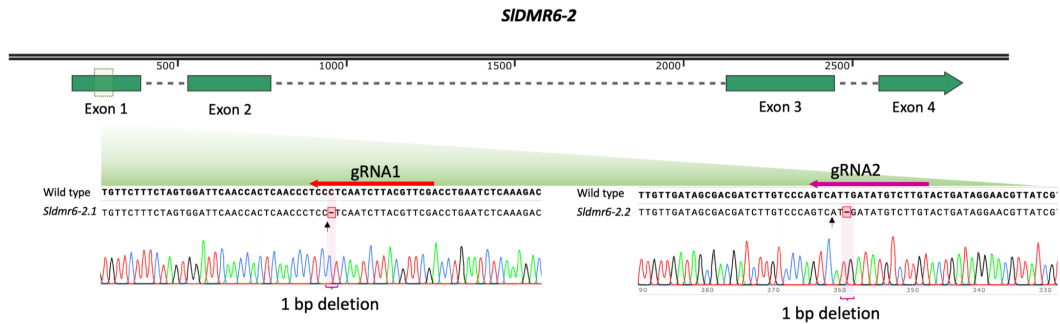

332  
 333  
 334  
 335  
 336  
 337  
 338  
 339  
 340  
 341  
 342

**Fig. S7.** *SIDMR6-2* guide RNAs (gRNAs) and mutant alleles. (A) Evaluation of gRNA activity using an *Agrobacterium*-based transient expression assay in *Nicotiana benthamiana*. Selected gRNAs (gRNA1 and gRNA2) target different regions of the first exon of the *SIDMR6-2* gene. The target regions were sequenced, and the mixed sequencing results confirm the activity of both gRNAs *in planta*. (B) Two independent constructs containing gRNA 1 or gRNA 2 were used to generate stable tomato transformants. Two homozygous lines with frameshift deletion alleles were produced: *Sldmr6-2.1* and *Sldmr6-2.2*. The predicted cleavage sites for each gRNA are indicated by an arrow, and the black dashes highlighted in red correspond to the missing DNA bases that cause the frameshift in the protein sequence.

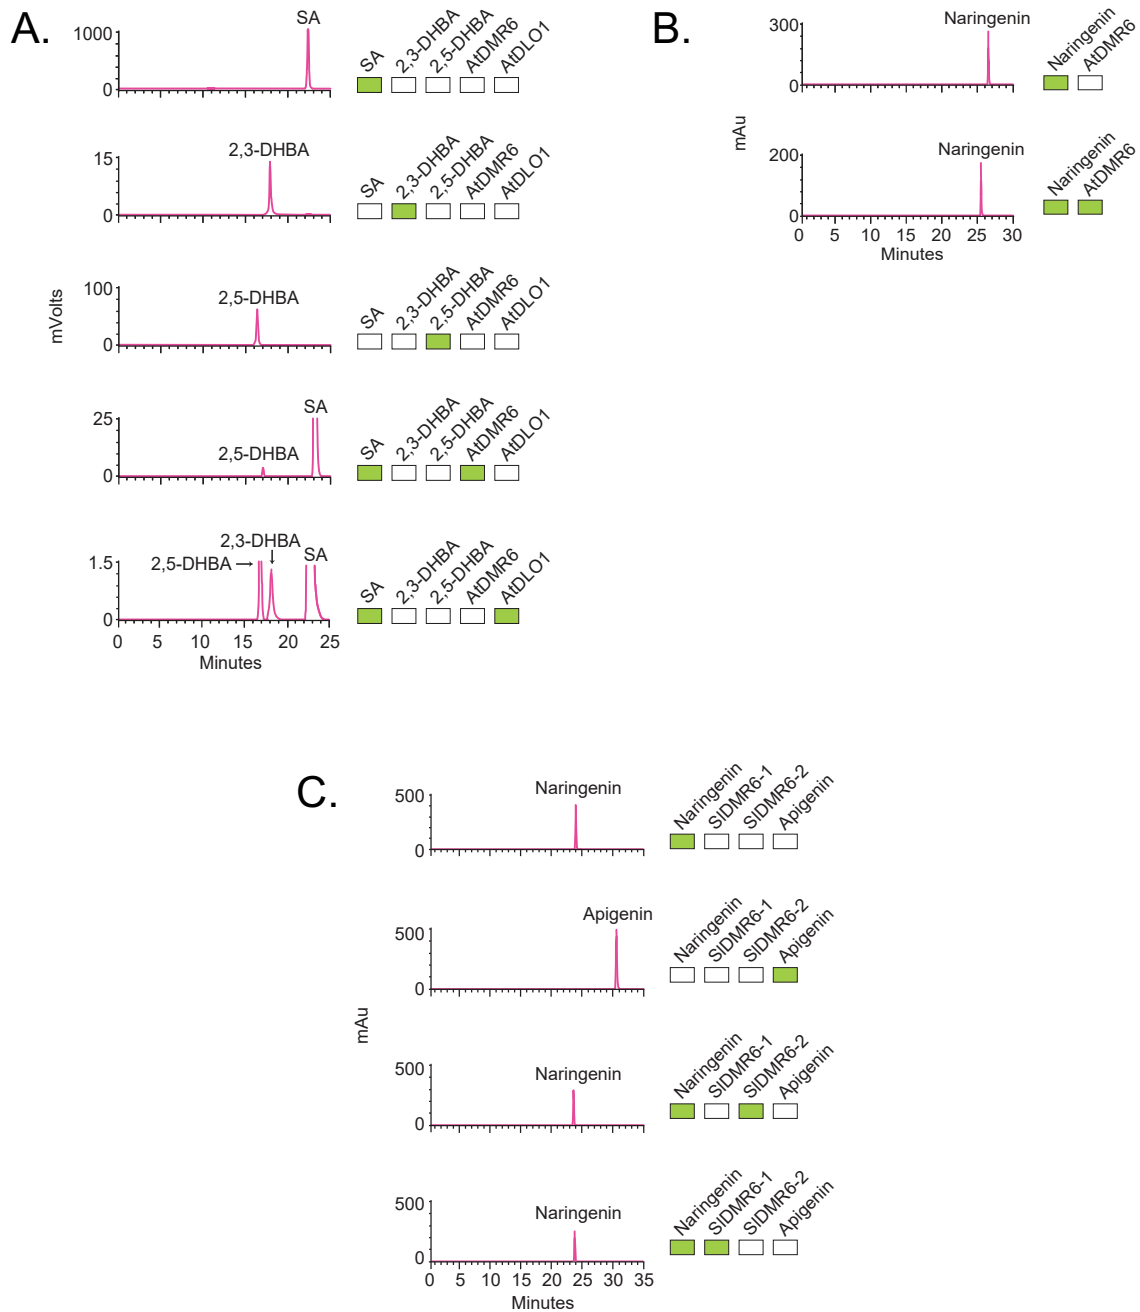

343  
344  
345  
346  
347  
348  
349  
350  
351  
352  
353  
354  
355

**Fig. S8.** AtDLO1 and AtDMR6 are salicylic acid (SA)-hydroxylase enzymes, and SIDMR6-1 and SIDMR6-2 do not show flavone synthase (FNS) activity. (A) HPLC profiles of the standards SA, 2,3-DHBA and 2,5-DHBA (first, second and third panels, respectively). In the presence of the recombinant protein AtDMR6, SA is converted to 2,5 DHBA, whereas, in the presence of AtDLO1, SA is converted to 2,3-DHBA and 2,5 DHBA (fourth and fifth panels, respectively). These results agree with previous literature data (18, 24). (B) HPLC profile of the standard naringenin (first panel). AtDMR6 is not able to use naringenin as a substrate under the tested conditions. (C) HPLC profile of the standard naringenin (first panel) and apigenin (second panel). Similar to AtDMR6 (24), SIDMR6-1 and SIDMR6-2 are not able to use naringenin as a substrate under the tested conditions (third and fourth panels). The green boxes indicate the presence of that compound in the reaction mixture.



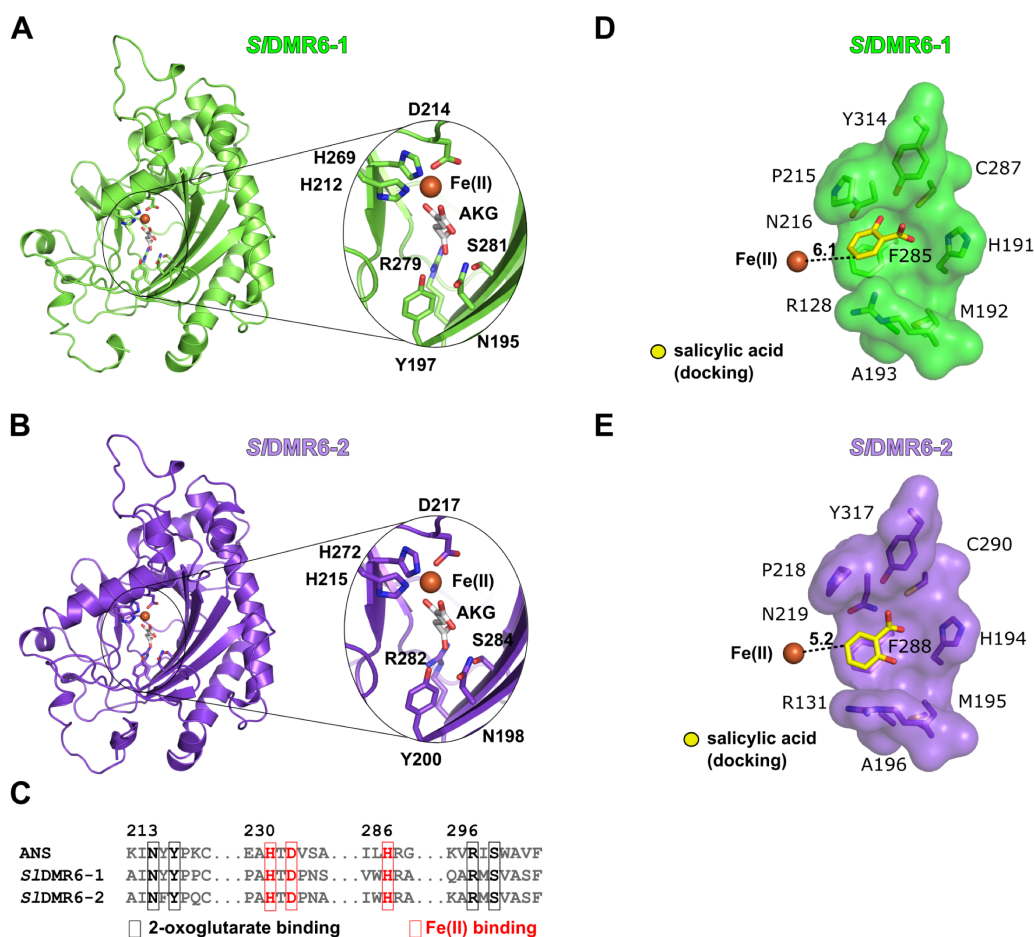

356  
357  
358  
359  
360  
361  
362  
363  
364  
365  
366  
367  
368  
369  
370

**Fig. S9.** Homology models of SIDMR6-1 and 2 show conserved features of 2-oxoglutarate Fe(II)-dependent dioxygenase (2-ODD) enzymes and a substrate-binding site that accommodates salicylic acid (SA). The SIDMR6-1 (A) and SIDMR6-2 (B) models were built using anthocyanidin synthase (ASN) as a template and displayed a z-DOPE score of -1.163 and -0.892, respectively. Magnified views highlight the conserved residues that bind to 2-oxoglutarate (AKG) and Fe(II), numbered according to their position in the respective enzyme sequence. Fe(II) and AKG coordinates were from the PDB 2BRT (33) superimposed to the SIDMR6 models. (C) Sequence alignment between ANS, SIDMR6-1, and SIDMR6-2 highlighting the conserved residues displayed in panels (A) and (B). Numbers correspond to amino acid positions in ANS. Molecular docking of SA into the substrate-binding site of SIDMR6-1 (D) and SIDMR6-2 (E) indicates two possible fits that place the C-5 carbon atom at a distance (dashed lines, Å) from Fe(II) similar to that found between Fe(II) and the reactive position (C-3 atom from central ring) of naringenin bound to ANS crystal structure (6.4 Å).

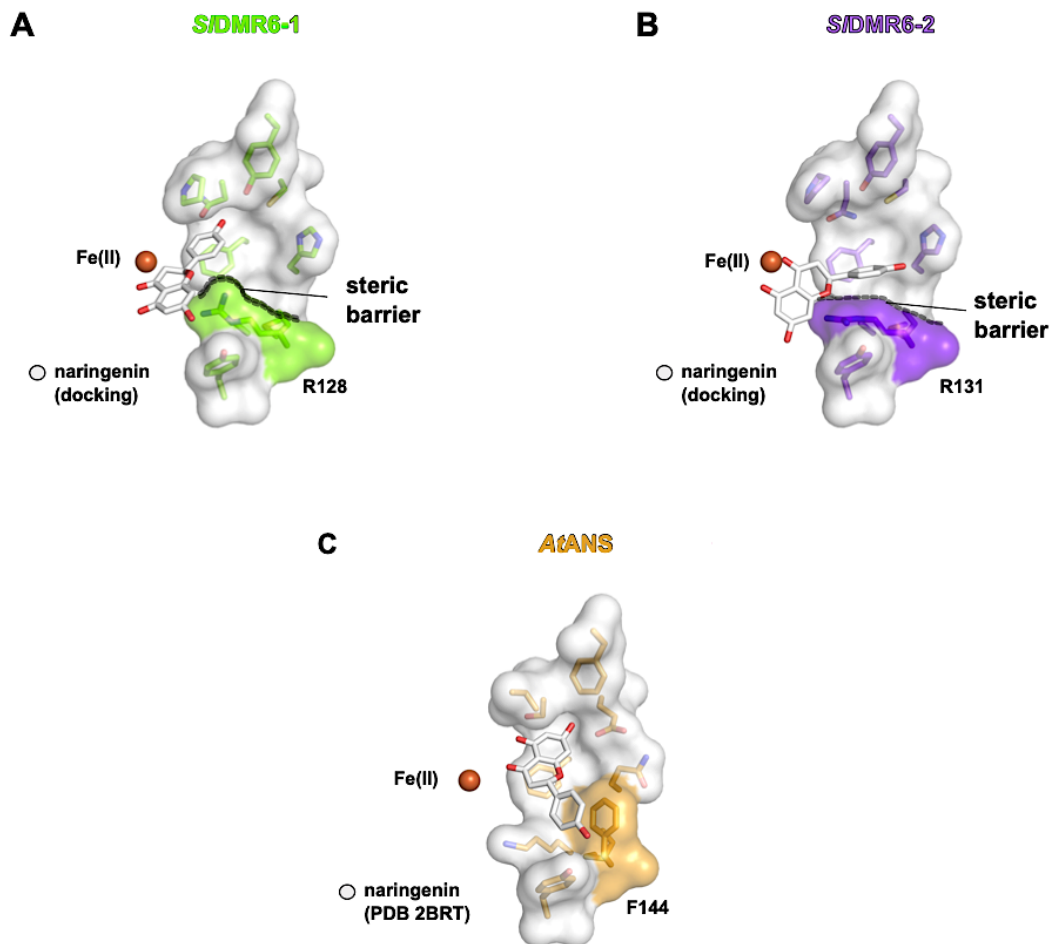

371  
 372 **Fig. S10.** An arginine residue conserved in DMR6 enzymes probably prevents naringenin to occupy  
 373 the same position as it does in AtANS. Panels (A) and (B) show molecular docking results of  
 374 naringenin at the active site of homology models of SIDMR6-1 and SIDMR6-2, respectively. Panel  
 375 (C) presents the crystal structure of AtANS-Fe(II)-alpha-ketoglutarate (AKG)-naringenin complex  
 376 (33). Residues equivalent to SIDMR6-1-Arg128 are highlighted by colored surfaces. Fe(II) and AKG  
 377 coordinates were from the PDB 2BRT (33) superimposed to the respective homology models  
 378 shown in panels (A), (B) and (C).  
 379

A.

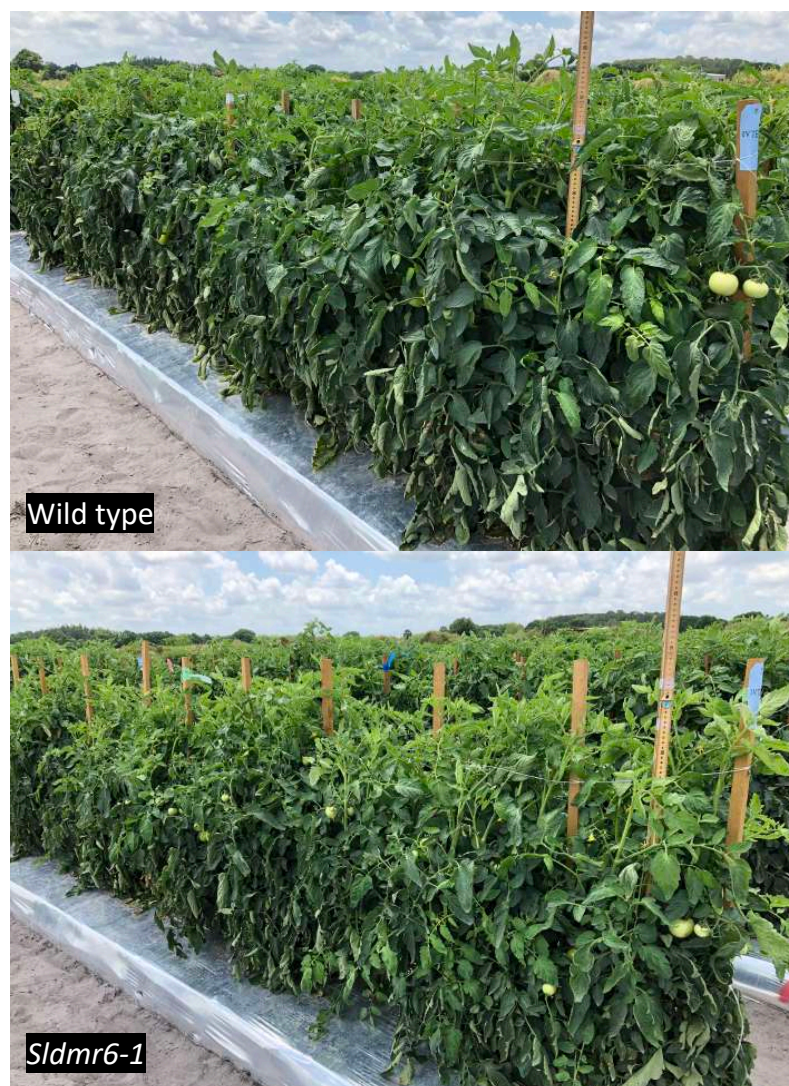

B.

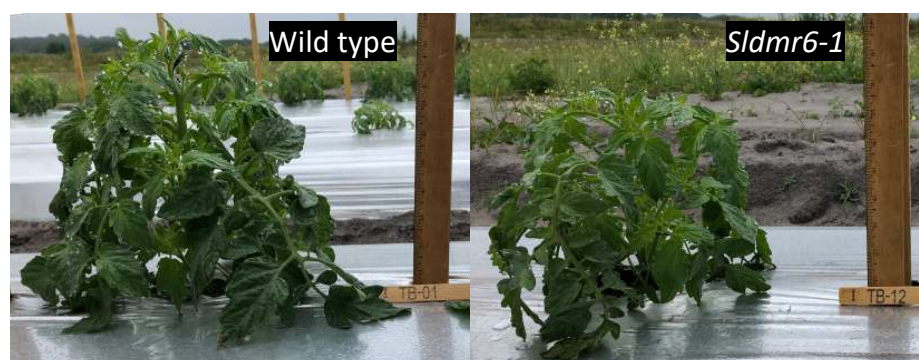

380  
381  
382  
383  
384  
385  
386  
387

**Fig. S11.** Growth phenotype of wild type and *Sldmr6-1* plants under field conditions. (A) Wild type and *Sldmr6-1* (*Sldmr6-1.1*) mutants growing under field conditions in Florida. (B) Individual plants of the wild type and *Sldmr6-1* (*Sldmr6-1.1*) genotypes showing the main differences in growth verified when the mutants were grown in the field. The *Sldmr6-1* lines are slightly stunted, and this trait affects the entire plant, including height, internode length and leaf size. It is worth mentioning that naturally existing *Xanthomonas* are always present in Florida, thus it is still necessary to evaluate the effect of *SIDMR6-1* mutation on healthy uninfected plants growing in the field.

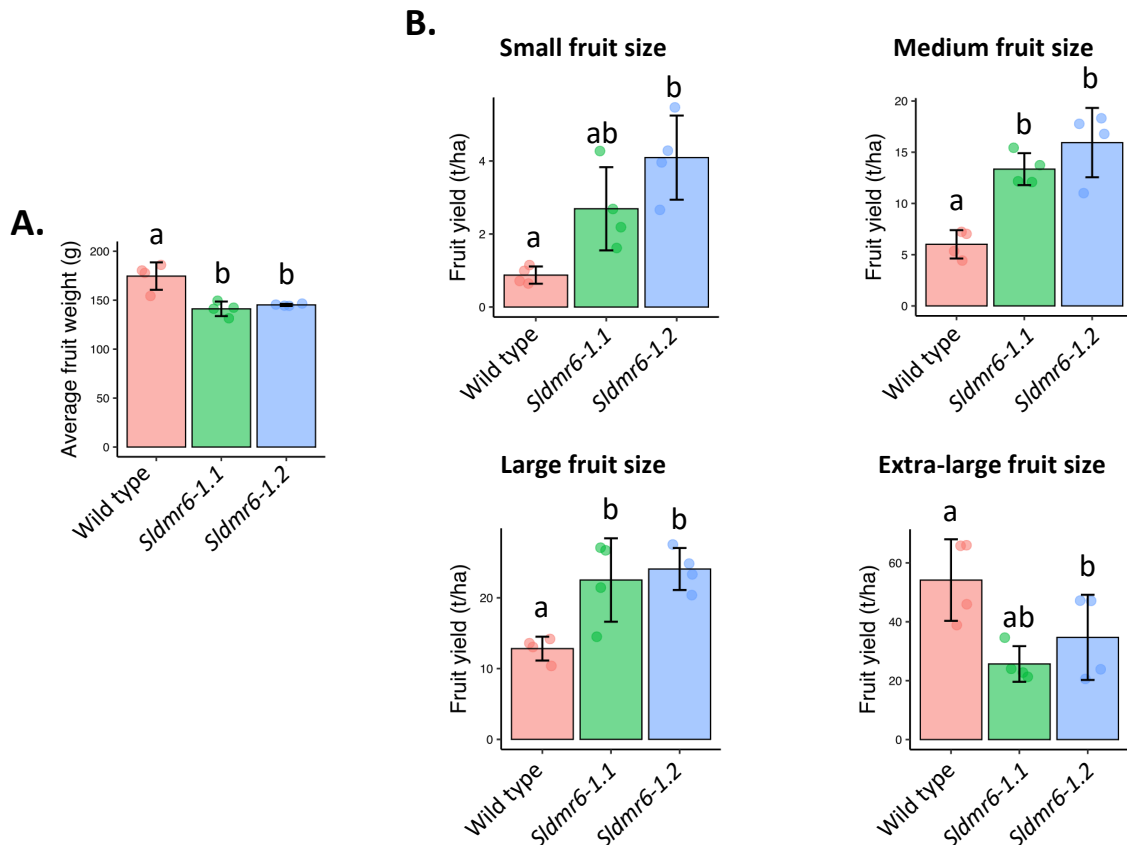

388  
 389 **Fig. S12.** Impact of the *SIDMR6-1* mutation on average fruit weight and yield (A) Comparison of  
 390 the average fruit weight of the wild type and the mutant lines *Sldmr6-1.1* and *Sldmr6-1.2*. Average  
 391 fruit weight includes the following fruit size categories: extra-large, large, and medium fruits. (B)  
 392 Yield of the different tomato fruit categories. Small fruits are unmarketable and, therefore, are not  
 393 used to determine total marketable yield. Both mutants show reduced yield of extra-large fruits, but  
 394 higher yield of large and medium fruits. As a result, total marketable yield is not altered (Fig. 6C).  
 395 The letters indicate significant difference between the conditions as determined using a one-way  
 396 ANOVA followed by a Tukey HSD test ( $p < 0.05$ ).

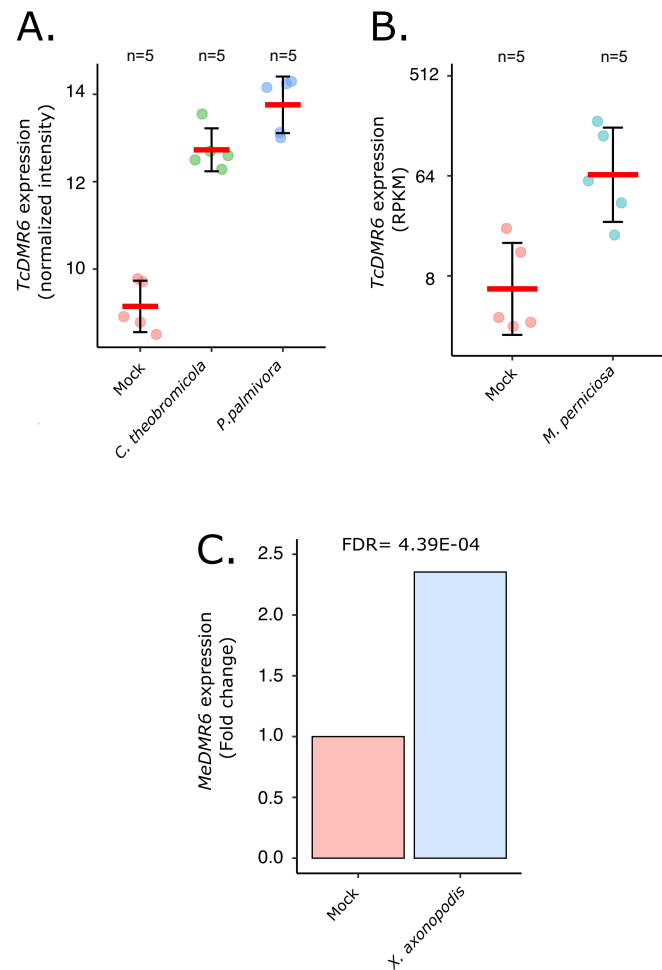

398

399

**Fig. S13.** Expression of *AtDMR6* orthologs in *Theobroma cacao* (cacao) and *Manihot esculenta* (cassava). (A) Upregulation of *TcDMR6* (Thecc1EG015521t1) in response to *Colletotrichum theobromicola*, *Phytophthora palmivora* and *Moniliophthora perniciosa* based on the analysis of public transcriptome data (FDR < 0.05) (7, 9). (B) Similarly, *MeDMR6* (Manes.01G043500.1) is also induced by pathogen infection (*Xanthomonas axonopodis* pv. *manihotis*) (n=3) (8).

404

405

406 **Table S1.** Primer sequences

| Primer names     | Sequences (5'- 3')           | Purpose                                                                                                                                                     |
|------------------|------------------------------|-------------------------------------------------------------------------------------------------------------------------------------------------------------|
| SIDMR6-1_Exon2_F | ATGGTGTACCAAAGGAAGTTGTAGAGA  | Forward primer to amplify a fragment of exon 2 of the <i>SIDMR6-1</i> gene for the Agrobacterium-based transient expression assays and for plant genotyping |
| SIDMR6-1_Exon2_R | TGCAACACTTCTCAGTTTGAGCCTCG   | Reverse primer to amplify a fragment of exon 2 of the <i>SIDMR6-1</i> gene for the Agrobacterium-based transient expression assays and for plant genotyping |
| SIDMR6-1_Exon3_F | AGATATTGCAGGGAAATTCGTCAACTC  | Forward primer to amplify a fragment of exon 3 of the <i>SIDMR6-1</i> gene for the Agrobacterium-based transient expression assays and for plant genotyping |
| SIDMR6-1_Exon3_R | GATGCCATACACTTCTGTACTTACCGTT | Reverse primer to amplify a fragment of exon 3 of the <i>SIDMR6-1</i> gene for the Agrobacterium-based transient expression assays and for plant genotyping |
| SIDMR6-1_gRNA1_F | ATTGTAGAGAAGTATGCTCCTGAA     | Forward primer for cloning <i>SIDMR6-1</i> gRNA1                                                                                                            |
| SIDMR6-1_gRNA1_R | AAACTTCAGGAGCATACTTCTCTA     | Reverse primer for cloning <i>SIDMR6-1</i> gRNA1                                                                                                            |
| SIDMR6-1_gRNA2_F | ATTGAGTTCTGGTTGTGGACAAGG     | Forward primer for cloning <i>SIDMR6-1</i> gRNA2                                                                                                            |
| SIDMR6-1_gRNA2_R | AAACCCTTGCCACAACCAGAACT      | Reverse primer for cloning <i>SIDMR6-1</i> gRNA2                                                                                                            |
| SIDMR6-2_Exon1_F | ATCAAGTCAGTAAAATGTGAACC      | Forward primer to amplify a fragment of exon 1 of the <i>SIDMR6-2</i> gene for the Agrobacterium-based transient expression assays and for plant genotyping |
| SIDMR6-2_Exon1_R | CTCTCCAATTATGAACAGTTTCC      | Reverse primer to amplify a fragment of exon 1 of the <i>SIDMR6-2</i> gene for the Agrobacterium-based transient expression assays and for plant genotyping |
| SIDMR6-2_gRNA1_F | ATTGTGCAACGTAAGATTGAGGGA     | Forward primer for cloning <i>SIDMR6-2</i> gRNA1                                                                                                            |
| SIDMR6-2_gRNA1_R | AAACTCCCTCAATCTTACGTTCTGA    | Reverse primer for cloning <i>SIDMR6-2</i> gRNA1                                                                                                            |
| SIDMR6-2_gRNA2_F | ATTGGTACAAGACATATCAATGAC     | Forward primer for cloning <i>SIDMR6-2</i> gRNA2                                                                                                            |

|                   |                                           |                                                                                  |
|-------------------|-------------------------------------------|----------------------------------------------------------------------------------|
| SIDMR6-2_gRNA2_R  | AAACGTCATTGATATGTCTTGAC                   | Reverse primer for cloning <i>SIDMR6-2</i> gRNA2                                 |
| Cas9_F            | ACAGAGAGATGATCGAGGAACGG                   | Forward primer to amplify the <i>Cas9</i> gene for genotyping                    |
| Cas9_R            | AGTTCCTGGTCCACGTACATATCC                  | Reverse primer to amplify the <i>Cas9</i> gene for genotyping                    |
| SIAct_qPCR_F      | TGTTCTCCTGACTGAGGCACC                     | <i>SIAct</i> forward primer to perform the qPCR analysis                         |
| SIAct_qPCR_R      | GACTAACACCATCACCAGAGTCC                   | <i>SIAct</i> reverse primer to perform the qPCR analysis                         |
| SIDMR6-1_qPCR_F   | ATTCAGATGATCCTTCAAAGACC                   | <i>SIDMR6-1</i> forward primer to perform the qPCR analysis                      |
| SIDMR6-1_qPCR_R   | GAATTTCCCTGCAATATCTGC                     | <i>SIDMR6-1</i> reverse primer to perform the qPCR analysis                      |
| GUS_F             | CTGTGGAATTGATCAGCGTTGG                    | Forward primer to amplify the reporter gene <i>GUS</i>                           |
| GUS_R             | CTCCATCACTTCCTGATTATTGACCC                | Reverse primer to amplify the reporter gene <i>GUS</i>                           |
| Pro_SIDMR6-1_F    | CACCTTGTTAGTGATATCTGTTGGC                 | Forward primer to amplify a 2.5 fragment of the <i>SIDMR6-1</i> gene             |
| Pro_SIDMR6-1_R    | GGAATCTATGGCTTATAATATATATGG               | Reverse primer to amplify a 2.5 fragment of the <i>SIDMR6-1</i> gene             |
| SIAct_RT_F        | TGTTCTCCTGACTGAGGCACC                     | Forward primer to amplify the <i>SIAct</i> gene by RT-PCR                        |
| SIAct_RT_R        | GACTAACACCATCACCAGAGTCC                   | Reverse primer to amplify the <i>SIAct</i> gene by RT-PCR                        |
| SIDMR6-2_RT_F     | TAGGCTACATTGTTATCCTTTGG                   | Forward primer to amplify the <i>SIDMR6-2</i> gene by RT-PCR                     |
| SIDMR6-2_RT_R     | CCTAAGCTCTCTGATATTGC                      | Reverse primer to amplify the <i>SIDMR6-2</i> gene by RT-PCR                     |
| AtDMR6_pET28a_F   | GCTAGCATGGCGCAAAGCTGATATC                 | Forward primer to amplify and clone the complete <i>AtDMR6</i> coding sequence   |
| AtDMR6_pET28a_R   | GAATTCTTAGTTGTTTAGAAAATTCTCG<br>AGGC      | Reverse primer to amplify and clone the complete <i>AtDMR6</i> coding sequence   |
| AtDLO1_pET28a_F   | GCTAGCATGGCAACTTCTGCAATATCTA<br>AG        | Forward primer to amplify and clone the complete <i>AtDLO1</i> coding sequence   |
| AtDLO1_pET28a_R   | GAATTCTTAGGTTGTTGGAGCTTTGAAG              | Reverse primer to amplify and clone the complete <i>AtDLO1</i> coding sequence   |
| SIDMR6-2_pET28a_F | TACGTGGATCCATGATGACAACAACAA<br>GTGTTCTTTC | Forward primer to amplify and clone the complete <i>SIDMR6-2</i> coding sequence |

|                   |                                         |                                                                                        |
|-------------------|-----------------------------------------|----------------------------------------------------------------------------------------|
| SIDMR6-2_pET28a_R | TCTACGAATTCTTAGGTTCCATCGTTCT<br>TAAAAAG | Reverse primer to amplify and clone<br>the complete <i>SIDMR6-2</i> coding<br>sequence |
| SIDMR6-1_pET28a_F | TACGTGGATCCATGGAAACCAAAGTTA<br>TTTCTAGC | Forward primer to amplify and clone<br>the complete <i>SIDMR6-1</i> coding<br>sequence |
| SIDMR6-1_pET28a_R | TCTACGAGCTCTTAGTTCTTGAAAAGTT<br>CCAAAC  | Reverse primer to amplify and clone<br>the complete <i>SIDMR6-1</i> coding<br>sequence |

407  
408



409  
410

**Table S2.** Effect of *SIDMR6-1* mutation and *Xanthomonas gardneri* 153 (*Xg*) infection in the number of differentially expressed genes (DEGs)

| Comparisons            |                        | Up-regulated | Down-regulated | Total DEGs |
|------------------------|------------------------|--------------|----------------|------------|
| <i>Sldmr6-1.2</i> Mock | <i>Sldmr6-1.1</i> Mock | 13           | 11             | 24         |
| <i>Sldmr6-1.2 Xg</i>   | <i>Sldmr6-1.1 Xg</i>   | 16           | 20             | 36         |
| <i>Sldmr6-1.1</i> Mock | Wild type Mock         | 760          | 514            | 1274       |
| <i>Sldmr6-1.1 Xg</i>   | Wild type <i>Xg</i>    | 1123         | 1108           | 2231       |
| <i>Sldmr6-1.2</i> Mock | Wild type Mock         | 523          | 328            | 851        |
| <i>Sldmr6-1.2 Xg</i>   | Wild type <i>Xg</i>    | 514          | 599            | 1113       |
| Wild type <i>Xg</i>    | Wild type Mock         | 903          | 365            | 1268       |
| <i>Sldmr6-1.1 Xg</i>   | <i>Sldmr6-1.1</i> Mock | 1149         | 926            | 2075       |
| <i>Sldmr6-1.2 Xg</i>   | <i>Sldmr6-1.2</i> Mock | 1079         | 969            | 2048       |

FDR <0.05 and  $|\log_2(\text{Fold change})| \geq 1$

411

412 **Dataset 1 (separate file).** Differentially expressed genes (DEGs) between wild type and *Sldmr6-1*  
413 mutants.

414 **Dataset 2 (separate file).** Gene Ontology (GO) terms that are enriched among DEGs of the  
415 *Sldmr6-1* mutant lines.

416 **Dataset 3 (separate file).** Differentially expressed genes (DEGs) of wild type and *Sldmr6-1*  
417 mutants in response to *Xanthomonas gardneri* (*Xg*) infection.

418 **Dataset 4 (separate file).** Comparison of the transcriptomes of the wild type, *Sldmr6-1.1* and  
419 *Sldmr6-1.2* tomato lines during *Xanthomonas gardneri* infection

420 **Dataset 5 (separate file).** Composition, gene ontology (GO) enrichment analysis and annotation  
421 of each cluster obtained in the hierarchical clustering analysis of Figure 3.

422

423

424

425 **SI References**

- 426 1. C. Camacho, *et al.*, BLAST+: architecture and applications. *BMC Bioinformatics* **10**, 421  
427 (2009).
- 428 2. K. Katoh, D. M. Standley, MAFFT multiple sequence alignment software version 7:  
429 improvements in performance and usability. *Mol Biol Evol* **30**, 772–780 (2013).
- 430 3. A. Stamatakis, RAxML version 8: a tool for phylogenetic analysis and post-analysis of large  
431 phylogenies. *Bioinformatics* **30**, 1312–1313 (2014).
- 432 4. J. Jupe, *et al.*, *Phytophthora capsici*-tomato interaction features dramatic shifts in gene  
433 expression associated with a hemi-biotrophic lifestyle. *Genome Biol* **14**, R63 (2013).
- 434 5. Y.-X. Yang, *et al.*, RNA-seq analysis reveals the role of red light in resistance against  
435 *Pseudomonas syringae* pv. *tomato* DC3000 in tomato plants. *BMC Genomics* **16**, 120  
436 (2015).
- 437 6. J. L. Costa, *et al.*, *Moniliophthora perniciosa*, the causal agent of witches' broom disease of  
438 cacao, interferes with cytokinin metabolism during infection of Micro-Tom tomato and  
439 promotes symptom development. *New Phytologist*, nph.17386 (2021).
- 440 7. A. S. Fister, *et al.*, *Theobroma cacao* L. pathogenesis-related gene tandem array members  
441 show diverse expression dynamics in response to pathogen colonization. *BMC Genomics*  
442 **17**, 363 (2016).
- 443 8. M. Cohn, *et al.*, *Xanthomonas axonopodis* Virulence Is Promoted by a Transcription  
444 Activator-Like Effector-Mediated Induction of a SWEET Sugar Transporter in Cassava.  
445 *MPMI* **27**, 1186–1198 (2014).
- 446 9. P. J. P. L. Teixeira, *et al.*, High-Resolution Transcript Profiling of the Atypical Biotrophic  
447 Interaction between *Theobroma cacao* and the Fungal Pathogen *Moniliophthora perniciosa*.  
448 *Plant Cell* **26**, 4245–4269 (2014).
- 449 10. T. L. Bailey, *et al.*, MEME SUITE: tools for motif discovery and searching. *Nucleic Acids*  
450 *Res* **37**, W202–W208 (2009).
- 451 11. A. Khan, *et al.*, JASPAR 2018: update of the open-access database of transcription factor  
452 binding profiles and its web framework. *Nucleic Acids Research* **46**, D260–D266 (2018).
- 453 12. S. Kunwar, *et al.*, Transgenic expression of *EFR* and *Bs2* genes for field management of  
454 bacterial wilt and bacterial spot of tomato. *Phytopathology* **108**, 1402–1411 (2018).
- 455 13. A. Schultink, T. Qi, A. Lee, A. D. Steinbrenner, B. Staskawicz, *Roq1* mediates recognition of  
456 the *Xanthomonas* and *Pseudomonas* effector proteins *XopQ* and *HopQ1*. *Plant J* **92**, 787–  
457 795 (2017).
- 458 14. T. Qi, *et al.*, NRG1 functions downstream of EDS1 to regulate TIR-NLR-mediated plant  
459 immunity in *Nicotiana benthamiana*. *Proc Natl Acad Sci USA* **115**, E10979–E10987 (2018).
- 460 15. P. Hajdukiewicz, Z. Svab, P. Maliga, The small, versatile pPZP family of *Agrobacterium*  
461 binary vectors for plant transformation. *Plant Mol Biol* **25**, 989–994 (1994).

- 462 16. T. Nakagawa, *et al.*, Development of series of gateway binary vectors, pGWBs, for realizing  
463 efficient construction of fusion genes for plant transformation. *Journal of Bioscience and*  
464 *Bioengineering* **104**, 34–41 (2007).
- 465 17. R. A. Jefferson, Assaying chimeric genes in plants: The *GUS* gene fusion system. *Plant Mol*  
466 *Biol Rep* **5**, 387–405 (1987).
- 467 18. K. Zhang, R. Halitschke, C. Yin, C.-J. Liu, S.-S. Gan, Salicylic acid 3-hydroxylase regulates  
468 *Arabidopsis* leaf longevity by mediating salicylic acid catabolism. *Proc Natl Acad Sci USA*  
469 **110**, 14807–14812 (2013).
- 470 19. A. Dobin, *et al.*, STAR: ultrafast universal RNA-seq aligner. *Bioinformatics* **29**, 15–21  
471 (2013).
- 472 20. Y. Liao, G. K. Smyth, W. Shi, featureCounts: an efficient general purpose program for  
473 assigning sequence reads to genomic features. *Bioinformatics* **30**, 923–930 (2014).
- 474 21. M. D. Robinson, D. J. McCarthy, G. K. Smyth, edgeR: a Bioconductor package for  
475 differential expression analysis of digital gene expression data. *Bioinformatics* **26**, 139–140  
476 (2010).
- 477 22. J. Huerta-Cepas, *et al.*, Fast genome-wide functional annotation through orthology  
478 assignment by eggNOG-mapper. *Molecular Biology and Evolution* **34**, 2115–2122 (2017).
- 479 23. G. Yu, L.-G. Wang, Y. Han, Q.-Y. He, clusterProfiler: an R package for comparing biological  
480 themes among gene clusters. *OMICS: A Journal of Integrative Biology* **16**, 284–287 (2012).
- 481 24. Y. Zhang, *et al.*, *S5H/DMR6* encodes a salicylic acid 5-hydroxylase that fine-tunes salicylic  
482 acid homeostasis. *Plant Physiol* **175**, 1082–1093 (2017).
- 483 25. B. Webb, A. Sali, Comparative protein structure modeling using MODELLER. *Curr Protoc*  
484 *Bioinformatics* **54** (2016).
- 485 26. R. C. Wilmoth, *et al.*, Structure and mechanism of anthocyanidin synthase from  
486 *Arabidopsis thaliana*. *Structure* **10**, 93–103 (2002).
- 487 27. M. Shen, A. Sali, Statistical potential for assessment and prediction of protein structures.  
488 *Protein Sci* **15**, 2507–2524 (2006).
- 489 28. G. M. Morris, *et al.*, AutoDock4 and AutoDockTools4: Automated docking with selective  
490 receptor flexibility. *J Comput Chem* **30**, 2785–2791 (2009).
- 491 29. O. Trott, A. J. Olson, AutoDock Vina: Improving the speed and accuracy of docking with a  
492 new scoring function, efficient optimization, and multithreading. *J Comput Chem*, NA-NA  
493 (2009).
- 494 30. J. G. Horsfall, R. W. Barratt, An improved grading system for measuring plant diseases.  
495 *Phytopathology* **35**, 655 (1945).
- 496 31. USDA, United States standards for grades of fresh tomatoes. *United States Department of*  
497 *Agriculture* (1991).
- 498 32. C. Béziat, J. Kleine-Vehn, E. Feraru, “Histochemical Staining of  $\beta$ -Glucuronidase and Its  
499 Spatial Quantification” in *Plant Hormones*, Methods in Molecular Biology., J. Kleine-Vehn,  
500 M. Sauer, Eds. (Springer New York, 2017), pp. 73–80.

501 33. R. W. D. Welford, I. J. Clifton, J. J. Turnbull, S. C. Wilson, C. J. Schofield, Structural and  
502 mechanistic studies on anthocyanidin synthase catalysed oxidation of flavanone substrates:  
503 the effect of C-2 stereochemistry on product selectivity and mechanism. *Org Biomol Chem*  
504 **3**, 3117 (2005).

505
